# Supplementary material for: Endovascular Treatment in Patients with Cerebral Artery Occlusion of Three Different Etiologies
Source: PubMed Central journal article supplement — J Stroke. 2020 May 31;22(2):234–44. doi: 10.5853/jos.2019.02404 (PMC7341019; doi:10.5853/jos.2019.02404), 2020-05-31
Supplement: jos-2019-02404-suppl.pdf [file jos-2019-02404-suppl.pdf]

**Supplementary Table 1.** Comparison of the outcomes in EVT according to the recruitment period

| Variable                              | Until December 31, 2014 (n=139) | From January 1, 2015 (n=122) | P     |
|---------------------------------------|---------------------------------|------------------------------|-------|
| Age (yr)                              | 66.5±10.9                       | 70.1±10.5                    | 0.007 |
| Male sex                              | 93 (66.9)                       | 73 (59.8)                    | 0.248 |
| Initial NIHSS                         | 11 (8–15)                       | 13 (10–17)                   | 0.005 |
| Hypertension                          | 89 (64.0)                       | 76 (62.3)                    | 0.798 |
| Diabetes                              | 36 (25.9)                       | 34 (27.9)                    | 0.780 |
| Hyperlipidemia                        | 45 (32.4)                       | 23 (18.9)                    | 0.016 |
| Atrial fibrillation                   | 57 (41.0)                       | 65 (53.3)                    | 0.062 |
| Etiologies                            |                                 |                              | 0.146 |
| Cardioembolism                        | 72 (51.8)                       | 77 (63.1)                    |       |
| Artery to artery embolism             | 31 (22.3)                       | 18 (14.8)                    |       |
| Intracranial arterial steno-occlusion | 36 (25.9)                       | 27 (22.1)                    |       |
| Onset to door time                    | 201.0 (66.0–516.0)              | 170.0 (49.0–477.5)           | 0.030 |
| Onset to recanalization time (min)    | 579.0 (331.0–1,464.0)           | 392.0 (253.0–847.3)          | 0.023 |
| Modalities of EVT                     |                                 |                              |       |
| Stent retriever                       | 83 (59.7)                       | 95 (77.9)                    | 0.002 |
| Suction thrombectomy                  | 56 (40.3)                       | 35 (28.7)                    | 0.052 |
| Angioplasty                           | 60 (43.2)                       | 28 (23.0)                    | 0.001 |
| Stent insertion                       | 49 (35.3)                       | 21 (17.2)                    | 0.001 |
| Use of tirofiban                      | 8 (5.8)                         | 6 (4.9)                      | 0.791 |
| Good outcome (mRS 0–2 at 3 mo)        | 65 (46.8)                       | 42 (34.4)                    | 0.045 |

Values are presented as mean±standard deviation, number (%), or median (interquartile range).  
EVT, endovascular treatment; NIHSS, National Institutes of Health Stroke Scale; mRS, modified Rankin Scale.
